# Supplementary material for: Revealing the properties of oils from their dissolved hydrocarbon compounds in water with an integrated sensor array system
Source: Royal Society of Chemistry journal article supplement (doi:10.1039/c1an15294g), 2011-01-01
Supplement: c1an15294g.pdf [file c1an15294g.pdf]

# Supplementary information

Table 1 GC-MS analysis result of the oil-water extract solutions of tested oils. (All concentrations are in µg/L.)

| Oil sample No. | Oil Name           | B     | T     | E    | m/p-X | o-X  | 135-TMB | 124-TMB | 123-TMB | N   | 2-MN | 1-MN | P  | Viscosity at 20°C (cP) | Density at 20°C (g/ml) |
|----------------|--------------------|-------|-------|------|-------|------|---------|---------|---------|-----|------|------|----|------------------------|------------------------|
| 9              | Arab medium        | 819   | 1519  | 414  | 465   | 351  | 25      | 100     | 47      | 36  | 20   | 24   | 2  | 35.40                  | 0.8915                 |
| 10             | Barrow             | 691   | 1506  | 93   | 618   | 216  | 64      | 120     | 65      | 41  | 75   | 47   | 2  | 4.95                   | 0.8481                 |
| C*             | Barrow-2           | 751   | 1735  | 106  | 646   | 229  | 67      | 125     | 67      | 47  | 79   | 49   | 2  | 4.95                   | 0.8481                 |
| 12             | Blina              | 16    | 40    | 25   | 59    | 38   | 34      | 55      | 13      | 15  | 11   | 7    | 5  | 12.59                  | 0.849                  |
| 13             | Challis            | 567   | 1032  | 143  | 1841  | 631  | 98      | 259     | 80      | 60  | 76   | 25   | 2  | 5.14                   | 0.8322                 |
| C*             | Challis-2          | 769   | 1331  | 192  | 2499  | 789  | 147     | 367     | 110     | 69  | 96   | 32   | 1  | 5.14                   | 0.8322                 |
| 14             | Coralina           | 294   | 824   | 187  | 715   | 264  | 53      | 95      | 46      | 171 | 80   | 54   | 3  | 2.56                   | 0.7513                 |
| 23             | Coralina-2         | 269   | 740   | 170  | 626   | 242  | 47      | 79      | 42      | 163 | 74   | 50   | 3  | 2.56                   | 0.7513                 |
| 2              | Diesel             | 144   | 386   | 87   | 307   | 173  | 35      | 140     | 56      | 62  | 42   | 31   | 1  | 3.58                   | 0.8332                 |
| 16             | Goodwyn            | 3371  | 5143  | 253  | 1598  | 565  | 73      | 156     | 56      | 238 | 116  | 74   | 3  | 6.77                   | 0.8504                 |
| 7              | Jabiru             | 1217  | 1569  | 166  | 1203  | 375  | 74      | 173     | 48      | 130 | 89   | 57   | 2  | 3.63                   | 0.8125                 |
| C*             | Jabiru-2           | 1151  | 1572  | 156  | 1101  | 350  | 73      | 168     | 48      | 137 | 105  | 64   | 3  | 3.63                   | 0.8125                 |
| 19             | NWS <sub>1</sub>   | 4     | 7     | 1    | 2     | 1    | 1       | 1       | 1       | 1   | 1    | 1    | 1  | 300.10                 | 0.95                   |
| 1              | NWS <sub>2-1</sub> | 2449  | 4169  | 321  | 1462  | 575  | 67      | 170     | 59      | 210 | 84   | 61   | 3  | 3.45                   | 0.8148                 |
| 11             | NWS <sub>2-2</sub> | 1883  | 3531  | 261  | 1194  | 494  | 55      | 144     | 52      | 207 | 80   | 61   | 2  | 3.45                   | 0.8148                 |
| 18             | NWS <sub>2-3</sub> | 1634  | 2828  | 208  | 939   | 408  | 43      | 107     | 42      | 188 | 71   | 54   | 2  | 3.45                   | 0.8148                 |
| 8              | NWS <sub>3</sub>   | 1     | 5     | 3    | 7     | 5    | 1       | 2       | 2       | 2   | 1    | 1    | 2  | 48.17                  | 0.921                  |
| C*             | NWS <sub>3-2</sub> | 1     | 6     | 3    | 8     | 6    | 1       | 2       | 1       | 5   | 2    | 1    | 2  | 48.17                  | 0.921                  |
| C*             | NWS mixture        | 624   | 1127  | 90   | 408   | 173  | 20      | 50      | 19      | 78  | 29   | 22   | 2  |                        |                        |
| C*             | Petro+diesel       | 4321  | 19116 | 964  | 3382  | 1838 | 75      | 365     | 125     | 96  | 22   | 15   | 0  |                        |                        |
| 3              | Petro-1            | 12866 | 28139 | 2095 | 7576  | 3873 | 138     | 673     | 217     | 123 | 4    | 3    | 0  | 0.6                    | 0.7377                 |
| 6              | Petro-2            | 8954  | 22146 | 1444 | 5244  | 2778 | 98      | 483     | 157     | 104 | 4    | 2    | 0  | 0.6                    | 0.7377                 |
| 15             | Petro-3            | 9526  | 22438 | 1563 | 5593  | 3020 | 101     | 504     | 168     | 105 | 4    | 3    | 0  | 0.6                    | 0.7377                 |
| 17             | Saladin            | 230   | 818   | 91   | 724   | 194  | 116     | 184     | 47      | 101 | 210  | 105  | 43 | 2.31                   | 0.7942                 |
| 24             | Saladin-2          | 331   | 1092  | 102  | 781   | 211  | 69      | 113     | 30      | 68  | 40   | 22   | 2  | 2.31                   | 0.7942                 |
| 4              | Skua               | 7716  | 5137  | 260  | 1498  | 565  | 65      | 177     | 59      | 272 | 106  | 74   | 2  | 3.40                   | 0.8185                 |
| C*             | Skua-2             | 11694 | 7362  | 350  | 2008  | 712  | 86      | 224     | 71      | 295 | 119  | 79   | 2  | 3.40                   | 0.8185                 |
| 5              | Swallow            | 2358  | 4754  | 288  | 2177  | 604  | 115     | 220     | 55      | 173 | 98   | 54   | 1  | 1.0                    | 0.7507                 |
| 25             | Swallow-2          | 1674  | 4305  | 279  | 2109  | 615  | 113     | 226     | 62      | 220 | 130  | 72   | 1  | 1.0                    | 0.7507                 |
| 20             | Yammaderry         | 294   | 913   | 94   | 438   | 206  | 70      | 40      | 27      | 65  | 36   | 21   | 4  | 2.9                    | 0.7903                 |

C\* represents control samples prepared for comparison purpose on relative chemical compositions yet not used in the subsequent sensor system evaluation.

B = Benzene, T = Toluene, E = Ethylbenzene, X = Xylene, TMB = Trimethylbenzene, N = Naphthalene, MN = Methylnaphthalene, P = Phenathrene

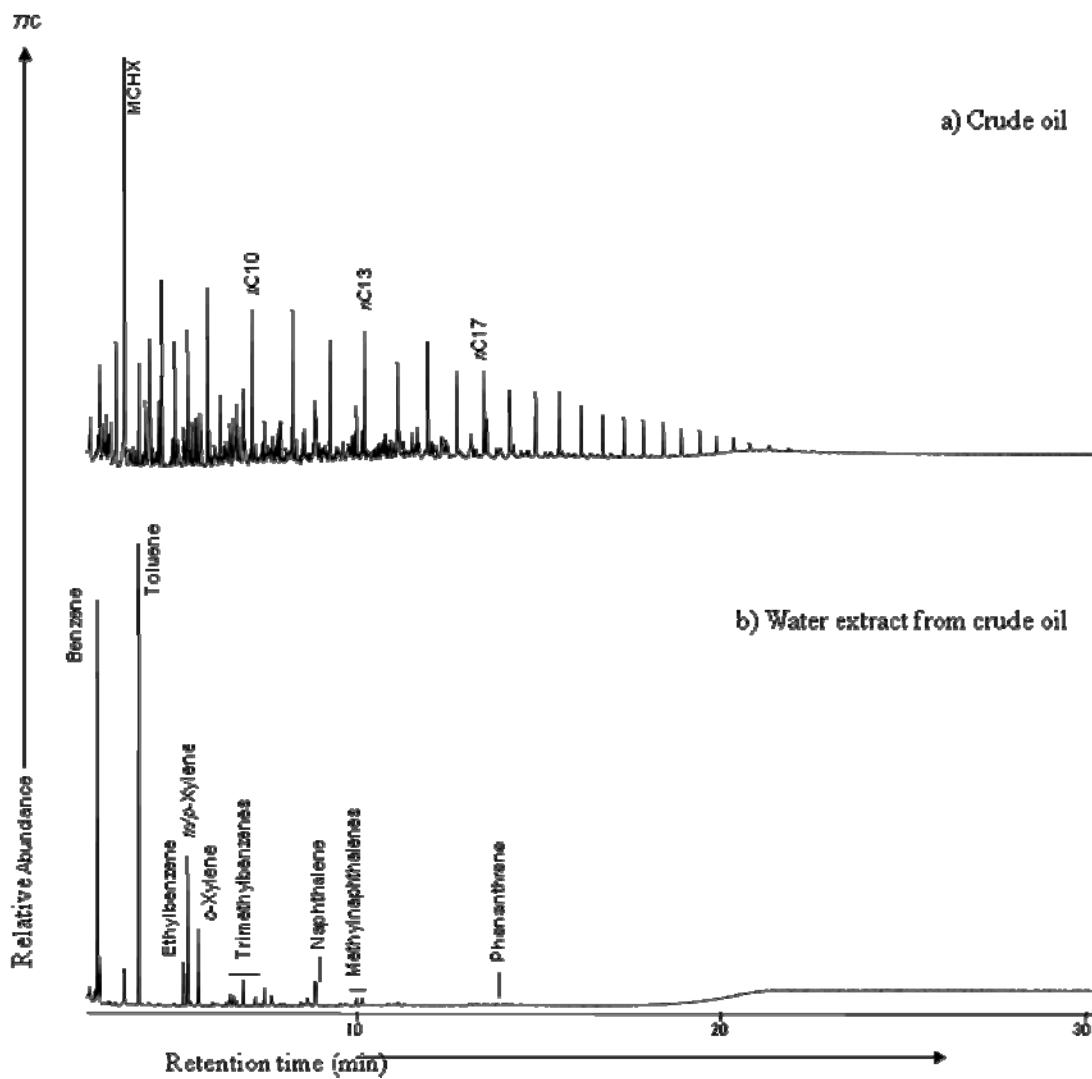

Fig. 1 Total ion chromatograms (TICs) from the GC-MS analyses of a) crude oil Swallow and b) water extract from crude oil Swallow, showing the dominant hydrocarbons selected for this study. MCHX = methylcyclohexane, nC10 = decane, nC13 = tridecane, nC17 = heptadecane.

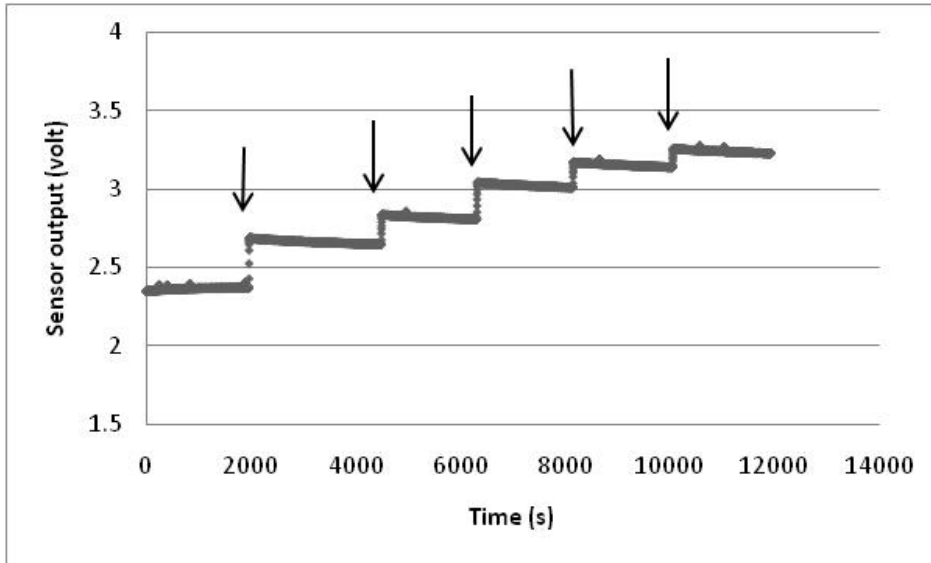

Fig. 2 A typical sensor response curve following addition 20 ml, 20ml, 40 ml, 40 ml and 40 ml of oil-water extract solution to 8L of synthetic sea water. The arrows indicate the addition of oil-water extract into the measurement tank.
